# Supplementary material for: Trait Development and CRISPR-Enabled Improvement in the African Orphan Crop Fonio (Digitaria exilis)
Source: Research Square preprint supplement (doi:10.21203/rs.3.rs-5743774/v1), 2025-01-08
Supplement: Supplementary file 1 [file 78b024d06b8501c8fb45c133.xlsx]

## Sheet: TableS1
Table S1. Fonio genome size estimates by kmer frequency.
	white01	white02	yellow01	yellow02
Total genome size (bp)	732729672	719948538	669736984	623412384
Unique genome size (bp)	519583238	513537903	509599652	474496370
repeat genome fraction (bp)	213146434	206410635	160137332	148916014
High copy repeat (%)	29	29	24	24

## Sheet: TableS2
Table S2. Fonio genome size estimation by flow cytometry.
	rep1	rep2	rep3	Average	STD
Fluorescence ratio (Fonio/Maize)	0.36	0.36	0.37	0.363	0.007
Estimated Fonio genome size (Mb)	814	833	854	833.7	20

## Sheet: TableS3
Table S3. Illumina read mapping to the Fonio Fundi-White (FW) and CM05836 Assemblies
Reads	target assembly	Mapping (%)
PI349688	FW (PI349688)	0.8961
PI349688	CM05836	0.0611

## Sheet: TableS4
Table S4. Time-of-day (TOD) RNA sequencing (RNA-seq) samples
	time	rep	read	file
1	0	1	1	1_3_AGGATAGC-GCTATCCT_L001_R1_001.fastq.gz
2	0	1	2	1_3_AGGATAGC-GCTATCCT_L001_R2_001.fastq.gz
3	0	2	1	1_7_AACAAGGC-GCCTTGTT_L001_R1_001.fastq.gz
4	0	2	2	1_7_AACAAGGC-GCCTTGTT_L001_R2_001.fastq.gz
5	0	3	1	1_8_GTTCTTCG-CGAAGAAC_L001_R1_001.fastq.gz
6	0	3	2	1_8_GTTCTTCG-CGAAGAAC_L001_R2_001.fastq.gz
7	6	1	1	2_10_CAACTTGG-CCAAGTTG_L001_R1_001.fastq.gz
8	6	1	2	2_10_CAACTTGG-CCAAGTTG_L001_R2_001.fastq.gz
9	6	2	1	2_1_GATTGTCC-GGACAATC_L001_R1_001.fastq.gz
10	6	2	2	2_1_GATTGTCC-GGACAATC_L001_R2_001.fastq.gz
11	6	3	1	2_4_GAGAGTAC-GTACTCTC_L001_R1_001.fastq.gz
12	6	3	2	2_4_GAGAGTAC-GTACTCTC_L001_R2_001.fastq.gz
13	12	1	1	3_10_ATGACAGG-CCTGTCAT_L001_R1_001.fastq.gz
14	12	1	2	3_10_ATGACAGG-CCTGTCAT_L001_R2_001.fastq.gz
15	12	2	1	3_12_GGCTCAAT-ATTGAGCC_L001_R1_001.fastq.gz
16	12	2	2	3_12_GGCTCAAT-ATTGAGCC_L001_R2_001.fastq.gz
17	12	3	1	3_9_CGCTACAT-ATGTAGCG_L001_R1_001.fastq.gz
18	12	3	2	3_9_CGCTACAT-ATGTAGCG_L001_R2_001.fastq.gz
19	18	1	1	4_13_TTCGCCAT-ATGGCGAA_L001_R1_001.fastq.gz
20	18	1	2	4_13_TTCGCCAT-ATGGCGAA_L001_R2_001.fastq.gz
21	18	2	1	4_20_GGTACGAA-TTCGTACC_L001_R1_001.fastq.gz
22	18	2	2	4_20_GGTACGAA-TTCGTACC_L001_R2_001.fastq.gz
23	18	3	1	4_8_CTCGGTAA-TTACCGAG_L001_R1_001.fastq.gz
24	18	3	2	4_8_CTCGGTAA-TTACCGAG_L001_R2_001.fastq.gz

## Sheet: TableS5
Table S5. Fonio lines for genomewide association study (GWAS)
Genotype	Country	Region	Village	Ethny	Life cycle
L05-01-F-A01	Senegal	Kaffrine	Koo Soce	Koniagui	early
L06-01-F-A01	Senegal	Kaffrine	Thiaranguène Koniagui	Koniagui	early
L06-02-F-A01	Senegal	Kaffrine	Thiaranguène Koniagui	Koniagui	early
L04-02-F-A01	Senegal	Kaffrine	Koo Soce	Mandingue	late
L01-01-F-A01	Senegal	Kaffrine	Keur Mandoumbé Diop	Mandingue	early
L04-04-F-A01	Senegal	Kaffrine	Koo Soce	Mandingue	late
L04-01-F-A01	Senegal	Kaffrine	Koo Soce	Peul	early
L02-05-F-A01	Senegal	Kaffrine	Nioro	Peul	early
L03-08-F-A01	Senegal	Kaffrine	Diam Diam Saly	Peul	late
L02-03-F-A01	Senegal	Kaffrine	Nioro	Peul	late
L02-08-F-A01	Senegal	Kaffrine	Nioro	Peul	early
G10_04_F_A01	Senegal	Kedougou	Kondokhou	Malinke	late
G08_06_F_A01	Senegal	Kedougou	Togue	Malinke	early
G12_05_F_A01	Senegal	Kedougou	Fodebinea	Malinke	late
G08_04_F_A01	Senegal	Kedougou	Togue	Malinke	late
G12_01_F_A01	Senegal	Kedougou	Fodebinea	Malinke	late
G12_06_F_A01	Senegal	Kedougou	Fodebinea	Malinke	early
G12_08_F_A01	Senegal	Kedougou	Fodebinea	Malinke	late
G08_05_F_A01	Senegal	Kedougou	Togue	Malinke	late
G08_07b_F_A01	Senegal	Kedougou	Togue	Malinke	early
G09_05_F_A01	Senegal	Kedougou	Malinda	Djallonke	late
G09_01_F_A02	Senegal	Kedougou	Malinda	Djallonke	early
G09_03_F_A01	Senegal	Kedougou	Malinda	Djallonke	late
G09_04_F_A01	Senegal	Kedougou	Malinda	Djallonke	early
G09_02_F_A01	Senegal	Kedougou	Malinda	Djallonke	late
G09_01_F_A01	Senegal	Kedougou	Malinda	Djallonke	early
G06_06_F_A01	Senegal	Kedougou	Bandafassi Tenda	Bedik	early
G06_03_F_A01	Senegal	Kedougou	Bandafassi Tenda	Bedik	late
G06_01_F_A01	Senegal	Kedougou	Bandafassi Tenda	Bedik	late
G06_05_F_A02	Senegal	Kedougou	Bandafassi Tenda	Bedik	early
G06_05_F_A01	Senegal	Kedougou	Bandafassi Tenda	Bedik	late
G07_02_F_A01	Senegal	Kedougou	Ethiolo	Bassari	late
G07_09_F_A01	Senegal	Kedougou	Ethiolo	Bassari	early
G07_03_F_A01	Senegal	Kedougou	Ethiolo	Bassari	late
G07_05_F_A02	Senegal	Kedougou	Ethiolo	Bassari	early
G07_07_F_A02_2	Senegal	Kedougou	Ethiolo	Bassari	late
M05-03-F-A02_2	Senegal	Kolda	Nemataba	Mandingue	late
M05-12-F-A01	Senegal	Kolda	Nemataba	Mandingue	early
M05-10-F-A01	Senegal	Kolda	Nemataba	Mandingue	late
M05-03-F-A01	Senegal	Kolda	Nemataba	Mandingue	late
M05-02-F-A01	Senegal	Kolda	Nemataba	Mandingue	early
M05-11-F-A01	Senegal	Kolda	Nemataba	Mandingue	late
M05-04-F-A01	Senegal	Kolda	Nemataba	Mandingue	early
M05-01-F-A01	Senegal	Kolda	Nemataba	Mandingue	late
M05-06-F-A01	Senegal	Kolda	Nemataba	Mandingue	early
M05-12-F-A02	Senegal	Kolda	Nemataba	Mandingue	early
I02-08-F-A02	Senegal	Kolda	Bari	Mandingue	early
M03-07-F-A01	Senegal	Kolda	Sare Yoro Yoba	Koniagui	late
M03-11-F-A01	Senegal	Kolda	Sare Yoro Yoba	Koniagui	early
M03-07-F-A02	Senegal	Kolda	Sare Yoro Yoba	Koniagui	late
M03-05-F-A01	Senegal	Kolda	Sare Yoro Yoba	Koniagui	early
M04-09-F-A01	Senegal	Kolda	Sinthian Yoro Diamanka	Koniagui	early
M07-01-F-A01	Senegal	Kolda	Manda Douane	Koniagui	early
M08-03-F-A01	Senegal	Kolda	Diam Weli Yoro	Koniagui	early
M09-01-F-A01	Senegal	Kolda	Saré Samba Kandé	Peul	late
M02-05-F-A01	Senegal	Kolda	Niandindiya	Peul	early
M02-11-F-A01	Senegal	Kolda	Niandindiya	Peul	late
M07-07-F-A01	Senegal	Kolda	Manda Douane	Peul	early
M06-02-F-A01	Senegal	Kolda	Pacour	Peul	early
M07-09-F-A01	Senegal	Kolda	Manda Douane	Peul	early
M08-05-F-A01	Senegal	Kolda	Diam Weli Yoro	Peul	late
M07-06-F-A01	Senegal	Kolda	Manda Douane	Peul	early
M07-03-F-A01	Senegal	Kolda	Manda Douane	Peul	early
L02-01-F-A01	Senegal	Kolda	Nioro	Peul	early
M08-02-F-A01	Senegal	Kolda	Diam Weli Yoro	Peul	early
M01-06-F-A01	Senegal	Kolda	Temento Samba	Peul	early
M07-10-F-A01	Senegal	Kolda	Manda Douane	Peul	early
M01-05-F-A01	Senegal	Kolda	Temento Samba	Peul	early
M07-04-F-A01	Senegal	Kolda	Manda Douane	Peul	early
M06-04-F-A01	Senegal	Kolda	Pacour	Peul	early
I06-09-F-A01	Senegal	Sedhiou	Manecounda	Balante	early
I05-11-F-A01	Senegal	Sedhiou	Francounda	Balante	late
I05-10-F-A01	Senegal	Sedhiou	Francounda	Balante	early
I06-06-F-A01	Senegal	Sedhiou	Manecounda	Balante	early
I05-05-F-A01	Senegal	Sedhiou	Francounda	Balante	late
I06-02-F-A01	Senegal	Sedhiou	Manecounda	Balante	early
I05-06-F-A01	Senegal	Sedhiou	Francounda	Balante	late
I05-09-F-A01	Senegal	Sedhiou	Francounda	Balante	late
I05-03-F-A01	Senegal	Sedhiou	Francounda	Balante	late
I06-07-F-A01	Senegal	Sedhiou	Manecounda	Mandingue	early
I04-02-F-A01	Senegal	Sedhiou	Mandina Findifeto	Mandingue	early
I07-03-F-A01	Senegal	Sedhiou	Faradianto	Mandingue	late
I04-05-F-A01	Senegal	Sedhiou	Mandina Findifeto	Mandingue	early
I02-07-F-A01	Senegal	Sedhiou	Bari	Mandingue	late
I02-09-F-A01	Senegal	Sedhiou	Bari	Mandingue	early
I02-08-F-A01	Senegal	Sedhiou	Bari	Mandingue	early
I04-02-F-A02	Senegal	Sedhiou	Mandina Findifeto	Mandingue	late
I02-05-F-A01	Senegal	Sedhiou	Bari	Mandingue	early
I02-06-F-A01	Senegal	Sedhiou	Bari	Mandingue	early
I04-03-F-A01	Senegal	Sedhiou	Mandina Findifeto	Mandingue	late
I07-11-F-A01	Senegal	Sedhiou	Faradianto	Mandingue	early
I07-10-F-A01	Senegal	Sedhiou	Faradianto	Mandingue	late
I07-06-F-A01	Senegal	Sedhiou	Faradianto	Mandingue	late
G03_02_F_A01	Senegal	Tambacounda	Missira Seydou	Mandingue	early
G03_03_F_A01	Senegal	Tambacounda	Missira Seydou	Mandingue	early
G03_08_F_A01	Senegal	Tambacounda	Missira Seydou	Mandingue	early
G05_12_F_A01	Senegal	Tambacounda	Damantan	Mandingue	early
G05_09_F_A01_1	Senegal	Tambacounda	Damantan	Mandingue	early
G05_03_F_A01	Senegal	Tambacounda	Damantan	Mandingue	early
G05_08_F_A01_2	Senegal	Tambacounda	Damantan	Mandingue	early
G04_01_F_A01	Senegal	Tambacounda	Vélingara Bidiancoto	Peul	early
G04_02_F_A01	Senegal	Tambacounda	Vélingara Bidiancoto	Peul	early
nso=north of Senegal oriental

## Sheet: TableS6
Table S6. Fonio phenotypes for genome wide association studies (GWAS).
Descriptors (Abbreviation)	Observed phenotypic classes	Evaluation phase
Qualitative
Form of leaf (FL)	1-lanceolate; 2-elliptic; 3-linear	After flowering
Pubescence of node (PN)	1-glabrous; 2-hairy	After flowering
Internodes color of the stem (ICS)	1-purple; 2-yellow; 3-red	After maturation
Quantitative
Flag leaf length (FLL)	Arithmetic means on the main stem of the five random samples	Anthesis
Flag leaf width (FLW)	Arithmetic means on the main stem of the five random samples	Anthesis
Length of peduncle (LP)	Arithmetic means on the main stem of the five random samples	After maturation
Length of internodes (LI)	Arithmetic means on the main stem of the five random samples	After maturation
Plant height (PH)	Arithmetic means on the main stem of the five random samples	After maturation
Number of node (NN)	Arithmetic means on the main stem of the five random samples	Anthesis
Number of tillers per plant (NTP)	Arithmetic means of the five random samples	Grain filling
Number of raceme per panicle (NRP)	Arithmetic means of the five random samples and ten panicles for each sample	Anthesis
Raceme length (RL)	Arithmetic means on the main stem of the five random samples	After maturation
Grouping spikelets (GS)	Arithmetic means on the five random samples	After maturation
Flowering cycle (FC)	Number of days from plant germination until 50% of the plant in each plot flowered	After flowering
Maturing cycle (MC)	Number of days after 50% of the panicles were mature	After maturation
Yield of aerial dry biomass (YAB)	Weight of biomass after drying of the plot	After maturation
Panicle yield (PY)	Arithmetic means of the five samples	After maturation
Grain yield (GY)	Arithmetic means of the five samples	After maturation

## Sheet: TableS7
Table S7. Fonio phenotype data for genome wide association studies (GWAS).
Replicate	Block	Environment	Genotype	Dry Biomass		Panicle Number	Floral Length	Raceme Length	Leaf Length	Leaf Width				50% Flowering (Anthesis)	Maturity Date		Plant Height
Rep	Bloc	Environement	Génotype	Biomassesèche	Nbrdenœud	Nbrracpanicule	LongueurH.Florale	Longueurraceme	Longueurfeuille	Largeurfeuille	Pdspanicule	Pdsgrains	Rgptepillet	datefloraison50prcent	datematurite	Nombredetalles	Hauteurplante
R1	B5	Kolda	G03-02-F-A01	16.974	10.6	3.4	28.72	13.42	4.88	0.22	4.01	2.178	2	60.5	72	102.2	90.34
R2	B5	Kolda	G03-02-F-A01	NA	14	3.4	33.08	12.58	5.88	0.18	NA	NA	2	64	76	221.8	110.58
R3	B1	Kolda	G03-02-F-A01	28.4	12.4	3.2	35.78	12.78	3.74	0.22	11.88	8.32	2	57	67	106.4	107.04
R1	B5	Sinthiou2	G03-02-F-A01	38.72	17.2	4.2	25.4	12.24	4.92	0.14	9.98	6.96	3.6	67	78	67.8	125.8
R2	B5	Sinthiou2	G03-02-F-A01	34.92	16.2	3.6	37.8	12.22	7.5	0.22	8.68	5.58	3.4	69	78	68.6	117.6
R3	B1	Sinthiou2	G03-02-F-A01	30.6	15	3.8	32.84	12.3	4.36	0.18	10.6	7.36	3.6	68	78	55	112.6
R1	B4	Kolda	G03-03-F-A01	17.648	12.4	3.2	28.68	10.38	3.68	0.26	4.51	3.292	2	64	72	66.4	97.9
R2	B6	Kolda	G03-03-F-A01	15.32	14.2	4.2	28.32	12.62	6.58	0.28	5.8	4.34	2	62	72	38.8	109
R3	B4	Kolda	G03-03-F-A01	50.84	15.8	3.6	32.94	11.42	4.54	0.15	18.58	13.4	2	63	70	167.4	100.32
R1	B4	Sinthiou2	G03-03-F-A01	10.68	15.8	4.4	37.5	14.36	9.16	0.32	2.32	1.76	3.6	62	76	14.8	149.6
R2	B6	Sinthiou2	G03-03-F-A01	23.64	16	3.2	29.02	14.1	9.56	0.28	5.54	4.08	3.2	62	75	35.6	132.6
R3	B4	Sinthiou2	G03-03-F-A01	6.54	14.4	3.6	33.8	12.84	5.42	0.28	1.54	1.28	3.4	63	75	15.2	117
R1	B2	Kolda	G05-03-F-A01	42.1	13	3.8	32.98	12.9	5.12	0.22	20.66	14.62	2	55	68	105.8	100.4
R2	B2	Kolda	G05-03-F-A01	NA	10.2	3.4	27.2	12.4	4.32	0.18	NA	NA	2	58	68	17.2	78.1
R3	B7	Kolda	G05-03-F-A01	30.52	12.8	4	32	12.38	4.96	0.2	13.48	8.94	2	56	68	62.6	97.24
R1	B2	Sinthiou2	G05-03-F-A01	14.3	15.8	4.4	28.62	13.04	6.28	0.22	3.34	2.42	3	55	70	28.6	123
R2	B2	Sinthiou2	G05-03-F-A01	8.38	15	4.2	31.9	11.28	6.96	0.2	2.14	1.64	3.4	54	70	15.6	121.2
R3	B7	Sinthiou2	G05-03-F-A01	15.46	14.4	3.8	29.84	11.32	5.76	0.14	4.94	3.66	3.2	55	69	21.4	117.6
R1	B7	Kolda	G05-08-F-A01	10.52	12.6	3.6	29.625	11.38	3.9	0.2	3.98	2.74	2	56	68	20.8	96.44
R2	B4	Kolda	G05-08-F-A01	NA	11.6	4.4	28.8	11.7	4.1	0.3	NA	NA	2	56	68	39.2	95.2
R3	B7	Kolda	G05-08-F-A01	20.64	13.4	4	27.7	11.84	4.56	0.2	9.38	6.44	2	56	68	40	102
R1	B7	Sinthiou2	G05-08-F-A01	20.66	14.2	4.8	27.7	11.34	8.32	0.26	5.48	3.82	3.4	52	67	24.6	128.4
R2	B4	Sinthiou2	G05-08-F-A01	18.96	13.4	3.8	28.88	12.46	9.18	0.26	5.94	4.6	3	54	68	32.8	122.6
R3	B7	Sinthiou2	G05-08-F-A01	12.3	15.6	4.6	25.1	11.8	8.46	0.2	4	2.92	3	52	67	26.8	127.6
R1	B8	Kolda	G05-09-F-A01	13.48	11.4	4	24.8	11.64	6.33333	0.233333	4.56	2.96	2	56	68	34.8	93.8
R2	B5	Kolda	G05-09-F-A01	14.84	13	4.2	30.4	12.8	4.96	0.34	6.18	4.22	2	56	68	34.2	106
R3	B1	Kolda	G05-09-F-A01	10.54	12	3.2	30.8	11	3.56	0.2	4.14	3.1	2	56	68	22.2	87.2
R1	B8	Sinthiou2	G05-09-F-A01	10.2	14	4.4	29.7	11.54	6.22	0.2	2.68	2.06	3.4	52	67	14.8	113
R2	B5	Sinthiou2	G05-09-F-A01	15.36	17	4.2	23.44	11.48	6.34	0.2	3.78	2.8	3.4	54	68	29.2	125.6
R3	B1	Sinthiou2	G05-09-F-A01	25	15.5	4.4	27.16	12.06	6.96	0.14	5.24	3.58	3.2	54	67	27.8	128.6
R1	B7	Kolda	G06-05-F-A01	11.04	13	2.8	23.48	12.96	3.76	0.14	4.78	3.28	2	66	72	30	94
R2	B7	Kolda	G06-05-F-A01	29.44	14.6	3.2	31.84	13.82	6.42	0.3	7.6	5.24	2	64	77	139.4	108.8
R3	B1	Kolda	G06-05-F-A01	26.32	16.6	3.8	24.56	11.86	3.94	0.14	9.02	6.16	2	67	76	104.2	99
R1	B7	Sinthiou2	G06-05-F-A01	20.7	23	3.2	33	12.24	7.1	0.2	3.72	2.3	3.2	79	94	35	149
R2	B7	Sinthiou2	G06-05-F-A01	15.18	22.2	3.8	33.9	14	7.1	0.22	2.26	1.68	3.8	79	94	24	145.2
R3	B1	Sinthiou2	G06-05-F-A01	26.22	19	3.4	34.8	12	7.7	0.22	2.84	1.74	3.4	84	95	39.6	133.2
R1	B5	Kolda	G07-02-F-A01	30.02	13.8	3	31.56	13.98	8.275	0.275	6.32	4.248	2	68	80	79.2	117.22
R2	B7	Kolda	G07-02-F-A01	53.56	14.6	3.6	24.56	14.74	9	0.36	8.5	4.88	2	70	79	171.6	111.26
R3	B2	Kolda	G07-02-F-A01	41.79	14.2	4	18	13	5.3	0.3175	7.41	4.564	2	60	72	125.4	114.24
R1	B5	Sinthiou2	G07-02-F-A01	46.056	20	3.8	31.8	13.5	10.94	0.26	2.624	1.55	3.8	103	113	43.6	152
R2	B7	Sinthiou2	G07-02-F-A01	28.36	22	3.4	26.94	13.3	7.34	0.24	3.76	2.88	3.8	95	108	35.4	155.2
R3	B2	Sinthiou2	G07-02-F-A01	33.14	18.8	3.4	33.1	13.3	6.6	0.18	4.62	3.36	3.6	95	108	50.8	140.8
R1	B1	Kolda	G07-03-F-A01	29.026	20.9	4	31.72	13.72	6.06	0.24	4.298	2.398	2	73	81	87.4	124.24
R2	B8	Kolda	G07-03-F-A01	35.406	22.6	3.4	23.04	13.48	6.82	0.34	7.66	6.798	2	74	82	76.2	118.48
R3	B1	Kolda	G07-03-F-A01	45.74	19.2	3.8	27.8	16.3	8.3	0.3	11.02	7.38	2	73	85	81.4	134.8
R1	B1	Sinthiou2	G07-03-F-A01	18.222	17.2	3.4	29	10.2	6.6	0.26	1.368	0.96	3.2	87	110	17.2	139.6
R2	B8	Sinthiou2	G07-03-F-A01	25.388	20.8	3.6	31.5	14.4	8.1	0.2	3.046	2.218	3.8	88	108	26.4	165.4
R3	B1	Sinthiou2	G07-03-F-A01	21.805	22.8	3.4	31.1	12.6	6.8	0.18	3.22	2.02	3.4	88	106	21.8	146.8
R1	B7	Kolda	G07-05-F-A01	14.14	14.2	3.2	28.78	13.02	5.32	0.24	4.84	3.14	2	62	72	47.6	100.02
R2	B8	Kolda	G07-05-F-A01	35.406	16.2	3.4	23.4	11.38	6.5	0.35	7.854	6.188	2	64	73	109.4	112.12
R3	B3	Kolda	G07-05-F-A01	14.84	15.2	3.4	31.68	12.9	4.92	0.22	3.34	2.26	2	62	72	47.2	99.66
R1	B7	Sinthiou2	G07-05-F-A01	15.2	15.4	4	24.6	11.8	7.54	0.32	2.98	2	3.25	70	83	15.4	124
R2	B8	Sinthiou2	G07-05-F-A01	19.1	18.6	3.8	30.7	12.8	7.2	0.24	2.42	1.82	3.8	68	82	29.8	142.4
R3	B3	Sinthiou2	G07-05-F-A01	11.64	20.8	4	28.9	11.52	6.56	0.22	2.04	1.58	3.8	68	79	16.4	143.2
R1	B6	Kolda	G07-05-F-A02	22.116	12.4	3.4	25.02	13.3	6.26	0.2	5.758	3.898	2	62	75	57.2	105.3
R2	B2	Kolda	G07-05-F-A02	17.962	15.4	3.2	30.82	13.88	4.72	0.22	6.666	4.402	2	64	75	52	106.36
R3	B2	Kolda	G07-05-F-A02	23.6	16	4	28.14	14.18	6.38	0.38	7	5.18	2	62	72	73.2	109.8
R1	B6	Sinthiou2	G07-05-F-A02	28.34	16	3.6	26.6	13.16	8.8	0.26	4.14	4.34	3.2	68	78	39.4	137.6
R2	B2	Sinthiou2	G07-05-F-A02	14.92	19.8	3	20	11.58	6	0.26	2.38	1.6	3	66	78	19.6	117.6
R3	B2	Sinthiou2	G07-05-F-A02	12.84	18.6	3.6	29.2	13.4	6.96	0.26	2.72	2.08	3.8	70	78	16.8	125
R1	B3	Kolda	G07-07-F-A02	101.832	16.8	3.4	28.5	13.66	6.2	0.26	24.872	13.448	2	60.5	73	242.6	125.36
R2	B2	Kolda	G07-07-F-A02	146.85	17.4	2.8	28.42	12.8	4.5	0.18	9.002	6.09	2	64	79	103.6	115.98
R3	B1	Kolda	G07-07-F-A02	191.867	22.3333	4.33333	33.4667	14.6333	8.5	0.3	16.94	9.77	2	57	67	267.333	150
R1	B3	Kolda	G07-09-F-A01	39.83	17	3	27.86	12.54	5.24	0.2	6.4	2.168	2	74	81	161.8	116.4
R2	B5	Kolda	G07-09-F-A01	NA	20.8	3.4	29.62	13.62	6.34	0.26	NA	NA	2	70	81	212.8	125.16
R3	B2	Kolda	G07-09-F-A01	71.52	20.5	3.5	26.55	11.85	5.675	0.175	20.74	14.56	2	76	85	157.4	120.25
R1	B5	Kolda	G08-01-F-A01	68.372	17.6	3.4	34.02	14.02	7.68	0.24	15.112	9.166	2	66	81	144.2	117.94
R2	B6	Kolda	G08-01-F-A01	15.29	14.6	3	29.06	13.56	3.84	0.14	4.888	4.662	2	71	78	46.2	102.28
R3	B4	Kolda	G08-01-F-A01	42.26	12.6	3	32.16	13.12	4.65	0.15	16.6	11.74	2	57	68	142	100.52
R1	B5	Sinthiou2	G08-01-F-A01	15.34	17.8	3.2	32	14.12	8.2	0.26	0.92	0.72	3.6	87	104	19.8	142.8
R2	B6	Sinthiou2	G08-01-F-A01	23.7	21	3	28.3	12.6	5.9	0.14	2.84	2.04	3.8	82	98	36.8	135
R3	B4	Sinthiou2	G08-01-F-A01	19.46	18.2	3.4	29	12.1	8	0.28	1.46	1.04	3	84	97	24	144.6
R1	B6	Kolda	G08-04-F-A01	37.728	13.8	3.4	29.54	14.04	6.16	0.22	9.672	6.736	2	74	80	64.8	107.42
R2	B4	Kolda	G08-04-F-A01	NA	16.4	3.6	27.1	13.52	6.94	0.22	NA	NA	2	72	77	94.4	110.8
R3	B7	Kolda	G08-04-F-A01	75.52	18.2	3.6	30.14	13.26	7	0.2	19.72	13.5	2	75	86	172.6	124.7
R1	B6	Sinthiou2	G08-04-F-A01	26.3	19.2	3.6	27.34	13.6	8.62	0.18	1.18	0.72	3.6	92	110	30.2	167.6
R2	B4	Sinthiou2	G08-04-F-A01	15.76	20.2	3.6	25.18	11.74	7.14	0.22	0.42	0.22	3.2	90	110	18	153.8
R3	B7	Sinthiou2	G08-04-F-A01	19.94	18.4	3.8	31.8	14	9.1	0.28	0.7	0.54	3.6	92	108	31.4	164.4
R1	B4	Kolda	G09-02-F-A01	14.86	15	3.2	27.64	12.34	4.74	0.14	4.966	3.698	2	66	81	40.8	100.18
R2	B7	Kolda	G09-02-F-A01	NA	12.6	3.2	31.48	13.36	5.74	0.32	NA	NA	2	66	77	42.4	96.68
R3	B4	Kolda	G09-02-F-A01	36.64	16.6	3.8	25.6	11.92	4.1	0.2	36.72	8.46	2	66	85	111.2	97.1
R1	B4	Sinthiou2	G09-02-F-A01	24.56	21.2	3.6	28.6	12.8	11.12	0.32	2.14	1.4	3.4	84	106	23.2	164.8
R2	B7	Sinthiou2	G09-02-F-A01	15.12	22.2	3	32.5	12.6	6.3	0.3	1.8	1.24	3.6	82	106	27.4	170.8
R3	B4	Sinthiou2	G09-02-F-A01	21.12	24.2	3.6	31.8	13.4	6.6	0.2	1.72	1.22	3.6	84	102	25.6	158.8
R1	B1	Kolda	G09-03-F-A01	42.6	14.4	3.8	24.88	11.96	8.46	0.32	6.7	4.6	2	64	80	112.2	116.18
R2	B3	Kolda	G09-03-F-A01	25.52	15.6	3.2	27.64	12.02	4.82	0.22	8.85	6.666	2	64	77	86.8	105.7
R3	B1	Kolda	G09-03-F-A01	34.06	17.4	3.4	30.98	12.64	5.1	0.22	7.78	5.63	2	67	76	100	121.98
R1	B1	Sinthiou2	G09-03-F-A01	19.74	21.6	3.2	27.3	11.9	6	0.22	2.24	1.5	3.2	82	104	20.4	133.4
R2	B3	Sinthiou2	G09-03-F-A01	11.24	16	3.6	31.6	11.4	7.6	0.22	0.96	0.8	3.4	86	104	16.6	139
R3	B1	Sinthiou2	G09-03-F-A01	15.3	18.2	3.2	31.4	12.7	7	0.24	0.9	0.58	3.6	84	104	22.8	135.4
R1	B4	Kolda	G09-04-F-A01	32	13.6	3.2	32.28	14.36	8.4	0.175	8.7	6.46	2	64	79	95.2	116.86
R2	B4	Kolda	G09-04-F-A01	NA	16	3.4	30.24	12.1	5.02	0.16	NA	NA	2	68	79	61.4	107.04
R3	B7	Kolda	G09-04-F-A01	21.84	13.8	3.4	25.76	13.3	4.26	0.18	7.42	4.24	2	68	76	74.4	103.9
R1	B4	Sinthiou2	G09-04-F-A01	10.806	18.8	3.4	31.1	11.72	5.16	0.24	2.27	1.842	3.6	83	100	21.8	128.2
R2	B4	Sinthiou2	G09-04-F-A01	13.78	19.6	3.6	33.1	13	8.9	0.26	1.32	0.92	4	84	97	16	127.8
R3	B7	Sinthiou2	G09-04-F-A01	9.588	18.2	3.2	28.9	10.9	5.1	0.16	0.66	0.54	3.2	79	98	12.8	114.2
R1	B3	Kolda	G12-05-F-A01	50.08	14.2	3.6	29.64	14.46	6.84	0.24	8.86	5.88	2	86.75	80	135.4	112.02
R2	B5	Kolda	G12-05-F-A01	54.9	13.2	3.2	34.14	12.28	4.14	0.18	18.18	9.2	2	91	85	180	100.78
R3	B4	Kolda	G12-05-F-A01	41.38	14.8	3.4	31.025	12.26	4.225	0.15	13.66	8.84	2	82.5	90	168.6	100.04
R1	B3	Sinthiou2	G12-05-F-A01	138.56	22.8	3.2	29.3	13	5.6	0.1	23.07	14.2	3	86	107	279.3	130.4
R2	B5	Sinthiou2	G12-05-F-A01	139.44	24.8	3.4	31	13.44	7	0.2	22.42	14.9	3.75	86	108	246.6	145
R3	B4	Sinthiou2	G12-05-F-A01	137.675	23.8	3.5	29.875	14.25	7.5	0.225	23.725	13.5	4	86	120	262.95	137.7
R1	B1	Kolda	I02-07-F-A01	171.165	17.6667	3.66667	31.1667	14.9667	5.53333	0.333333	29.65	19.88	2	64	80	501.667	135.667
R2	B7	Kolda	I02-07-F-A01	142.93	12	3	31.36	10.5	4.9	0.2	20.218	13.838	2	69	77	426.93	93.06
R3	B8	Kolda	I02-07-F-A01	114.7	18.4	3.8	23.24	13.4	4.28	0.26	39.08	25.92	2	68	80	352.2	122.94
R1	B1	Sinthiou2	I02-07-F-A01	77.02	21.9	3.5	29.25	13	7.25	0.2	6.3	4.7	4	84	106	235	149.3
R2	B7	Sinthiou2	I02-07-F-A01	57.04	20.2	3.25	29.6	12.3	5.3	0.18	11.58	6.82	3.4	80	98	266	120.4
R3	B8	Sinthiou2	I02-07-F-A01	67.03	23.6	3.2	42.9	14.9	8	0.18	10.22	7.22	3.4	79	99	297	178.2
R1	B6	Kolda	I03-05-F-A01	21.068	13.6	3.8	39.34	14.92	7.04	0.28	6.618	4.856	2	65	75	58.8	130.04
R2	B8	Kolda	I03-05-F-A01	NA	16	3.4	27.02	11.88	7.925	0.4	NA	NA	2	64	75	31.4	122.52
R3	B3	Kolda	I03-05-F-A01	41	16	3.2	29.88	13.34	6.02	0.26	10.82	7.18	2	64	75	132.6	115.24
R1	B6	Sinthiou2	I03-05-F-A01	9.82	17.2	3.4	31.4	12.5	6.22	0.14	1.5	1.16	3.4	71	90	11.2	128.2
R2	B8	Sinthiou2	I03-05-F-A01	9.26	16.2	3.4	29	13.4	7.3	0.16	2.14	1.72	3.4	71	90	13	142.6
R3	B3	Sinthiou2	I03-05-F-A01	4.64	13	3.6	35.3	13	6.4	0.22	1.1	0.82	3.6	70	91	7.8	121.8
R1	B2	Kolda	I04-02-F-A02	21.32	15.6	3	27.96	11.9	7.1	0.24	2.5	1.82	2	75	81	80.8	127.74
R2	B8	Kolda	I04-02-F-A02	NA	16.6	3.4	27.54	14.32	8.86	0.32	NA	NA	2	73	80	70.6	127.6
R3	B1	Kolda	I04-02-F-A02	52.02	15.8	4	34.78	15.68	7.05	0.275	13.76	9.1	2	73	85	103.8	122.38
R1	B2	Sinthiou2	I04-02-F-A02	18.86	20.8	3.4	21.3	12.2	5.9	0.16	1.96	1.42	3.6	88	108	28.4	131
R2	B8	Sinthiou2	I04-02-F-A02	29.16	16.6	3.6	34.1	12.58	6.7	0.16	1.7	1.18	3.6	90	108	41.8	164.2
R3	B1	Sinthiou2	I04-02-F-A02	25.092	18.2	3.8	27.7	11.7	5.44	0.14	0.62	0.44	3.6	95	108	13.2	152.4
R1	B3	Kolda	I04-03-F-A01	19.38	13.8	4	28.24	13.94	9.88	0.32	1.928	0.954	2	74	80	56.4	119.86
R2	B4	Kolda	I04-03-F-A01	NA	21.8	3.8	32.5	13.96	7.5	0.3	NA	NA	2	72	81	132	114.86
R3	B1	Kolda	I04-03-F-A01	58.4	12.2	4.4	24.76	14.3	11.04	0.26	11.76	7.3	2	73	85	117.8	109.86
R1	B3	Sinthiou2	I04-03-F-A01	15.5	18.4	3	29.1	12.9	5.9	0.16	0.6	1.42	3.6	94	113	14.4	136
R2	B4	Sinthiou2	I04-03-F-A01	11.88	20.8	3.8	29.2	13.64	6.9	0.26	0.56	0.38	3.4	97	113	11.4	157
R3	B1	Sinthiou2	I04-03-F-A01	18.06	21	3.6	24.2	13.6	8.04	0.2	0.64	0.36	3.8	92	108	19.4	164.4
R1	B4	Kolda	I05-01-F-A01	16.142	13.6	3.4	35.8	14	8.52	0.22	3.298	2.238	2	64	79	38.4	129.82
R2	B4	Kolda	I05-01-F-A01	NA	17.2	3.6	28.82	14	5.96	0.26	NA	NA	2	65	77	100.6	116.96
R3	B8	Kolda	I05-01-F-A01	41.04	18.4	4.2	29.84	13.44	6.1	0.26	11.32	6.98	2	68	80	119.4	128.88
R1	B4	Sinthiou2	I05-01-F-A01	20.54	19.6	3.6	33.18	13.3	7.56	0.32	3.7	2.72	3.6	71	91	20.4	149.4
R2	B4	Sinthiou2	I05-01-F-A01	16.62	18.2	3	35.9	14.2	6.6	0.22	2.42	1.72	3.4	71	90	26.4	140.6
R3	B8	Sinthiou2	I05-01-F-A01	35.34	19.8	4	29.5	14.3	6.9	0.18	2.08	1.36	3.2	72	92	43.4	164.8
R1	B4	Kolda	I05-03-F-A01	34.9567	8	3.33333	30.4667	11.3	2.33333	0.233333	7.21333	2.66667	2	66	77	191.667	82.7667
R2	B1	Kolda	I05-03-F-A01	22	15.8	3.6	30.18	13.38	4	0.2	6.64	5.22	2	64	77	74.6	123.86
R3	B5	Kolda	I05-03-F-A01	25.66	15.6	3.4	28.76	13.82	5.64	0.24	6.56	3.84	2	67	76	71.4	112.76
R1	B4	Sinthiou2	I05-03-F-A01	52.42	11.4	3.6	33.9	12.92	5.72	0.18	10.69	6.61	3.2	80	98	269.4	99.6
R2	B1	Sinthiou2	I05-03-F-A01	23.78	10.8	4.2	27.7	11.7	6.9	0.18	9.84	5.72	3.6	79	97	237.7	99.8
R3	B5	Sinthiou2	I05-03-F-A01	42.64	14.8	4	30.1	11	7.02	0.26	11.54	7.5	3.2	79.5	98	206	97.8
R1	B7	Kolda	I05-03-F-A02	27.9975	14.4	4.2	37.04	14.5	8.12	0.3	13.198	4.5625	2	61.75	79	157.4	127.76
R2	B8	Kolda	I05-03-F-A02	87.846	15.2	3.6	31.24	12.32	3.52	0.3	14.946	6.566	2	65.5	78	318.6	122.92
R3	B4	Kolda	I05-03-F-A02	53.62	11.6	3.2	27.48	12.34	5.5	0.3	20.42	13.24	2	58	76	267.333	85.28
R1	B7	Sinthiou2	I05-03-F-A02	19.76	17.2	3.8	32.5	14.3	6.16	0.18	1.206	0.884	3.6	74	94	15.4	143.8
R2	B8	Sinthiou2	I05-03-F-A02	16.32	16.2	3.4	34.8	14.1	8	0.18	1.66	1.16	3.8	75	98	26.4	159.6
R3	B4	Sinthiou2	I05-03-F-A02	16.88	18.2	3.4	34.2	12.2	6.5	0.22	1.06	0.72	3.4	78	94	16.2	139.8
R1	B1	Kolda	I05-04-F-A01	54	22.4	3.6	35.52	15.26	5.48	0.22	12.56	8	2	64	80	355.6	155.44
R2	B4	Kolda	I05-04-F-A01	47	15.8	3.2	33.24	13	6.24	0.3	NA	NA	2	65	75	260.2	120.14
R3	B6	Kolda	I05-04-F-A01	47.24	14	3.2	34.78	14.76	5.82	0.16	12.88	7.48	2	67	76	164.8	114.68
R1	B1	Sinthiou2	I05-04-F-A01	11.4	18.4	2.8	29.9	13.8	6.5	0.18	1.08	0.8	3.6	80	104	21	133.2
R2	B4	Sinthiou2	I05-04-F-A01	15.36	19.8	3.8	29.4	13.7	7.8	0.24	1.06	0.72	3.6	74	90	23.4	162.4
R3	B6	Sinthiou2	I05-04-F-A01	12.22	18	4.2	33	12.92	6.1	0.18	1.5	1.04	3.4	77	90	7.2	139.6
R1	B5	Kolda	I05-05-F-A01	17.24	12.6	3.6	36.02	14.44	7.48	0.21	5.706	4.046	2	67	78	44.8	122.46
R2	B8	Kolda	I05-05-F-A01	13.572	14.2	3.4	28.22	13.94	6.26	0.2	7.32	4.864	2	66	75	83.8	114.26
R3	B8	Kolda	I05-05-F-A01	46.4	17.2	3.4	31.44	12.7	5.32	0.22	5.28	2.8	2	68	80	161.8	130.44
R1	B5	Sinthiou2	I05-05-F-A01	11.2	20	3.6	35.94	13.8	8.7	0.3	1.14	0.94	4	75	92	13.6	162.8
R2	B8	Sinthiou2	I05-05-F-A01	12.8	16.2	3.8	36.2	13.36	7.9	0.26	1.2	0.82	3.2	75	94	17	169.6
R3	B8	Sinthiou2	I05-05-F-A01	12.1	15.8	3	37.5	15.6	8.3	0.22	0.78	0.52	3.6	75	90	12.8	148.8
R1	B1	Kolda	I05-07-F-A01	79.14	16.2	3.6	34.3	13.54	6.68	0.16	20.42	14	2	66	80	184.2	132.68
R2	B4	Kolda	I05-07-F-A01	15.6	15	3.4	34.36	14.78	5.52	0.24	6.2	NA	2	66	75	56	122.98
R3	B8	Kolda	I05-07-F-A01	20.54	11.4	3.6	28.16	14.36	6.1	0.28	6.08	3.8	2	68	76	47.8	116.8
R1	B1	Sinthiou2	I05-07-F-A01	28.64	15.8	3.2	29.3	13.16	5.4	0.14	3.54	2.58	3.6	79	98	49.2	129.4
R2	B4	Sinthiou2	I05-07-F-A01	12.74	19.8	3.8	31.48	13.7	6.2	0.2	0.44	0.3	3.6	79	97	23	131.6
R3	B8	Sinthiou2	I05-07-F-A01	15.54	19.8	3.2	32.7	12.3	6.5	0.2	1.04	0.84	3	77	98	25.4	156.4
R1	B3	Kolda	I05-08-F-A01	43.82	13	3.6	38.3	15.38	9.3	0.26	7.12	4.34	2	74	77	127.6	132.56
R2	B5	Kolda	I05-08-F-A01	14.06	14	3.2	31.04	13.84	5.425	0.15	4.38	3.7	2	66	77	30.2	115.28
R3	B6	Kolda	I05-08-F-A01	44.34	13.6	3.4	34.6	14.98	8.04	0.22	11.42	7.3	2	67	76	91.2	125.46
R1	B3	Sinthiou2	I05-08-F-A01	10.08	17.4	3.6	29.7	14.3	7.1	0.16	1.44	0.96	3.4	79	94	18.6	114
R2	B5	Sinthiou2	I05-08-F-A01	12.02	18.8	3.2	40.3	13.9	7.4	0.22	0.68	0.52	3.4	79	97	16.2	156
R3	B6	Sinthiou2	I05-08-F-A01	14	19.6	3.6	33.3	13.4	6.8	0.2	2.14	1.64	3.4	75	90	15.4	165.8
R1	B6	Kolda	I06-01-F-A02	32.026	14.2	3.2	32.36	14.32	8.62	0.22	4.92	3.328	2	74	82	64	125.52
R2	B4	Kolda	I06-01-F-A02	NA	14	3.6	34.34	14.18	8.25	0.275	NA	NA	2	72	82	74.2	112.6
R3	B6	Kolda	I06-01-F-A02	10.28	12.2	4	31.68	13.88	8.84	0.26	1.56	0.84	2	75	85	21.8	118.3
R1	B6	Sinthiou2	I06-01-F-A02	20.634	18	3.8	32.54	13.7	7.34	0.22	1.18	0.794	3.6	96	115	9.4	165.6
R2	B4	Sinthiou2	I06-01-F-A02	18.1	20	3.4	31.6	14.7	7.2	0.2	0.66	0.4	3.6	93	113	26.6	156.4
R3	B6	Sinthiou2	I06-01-F-A02	22.38	19.2	3.8	35.9	15.2	10.76	0.36	1	0.62	3.4	92	108	28.8	161.4
R1	B4	Kolda	I06-03-F-A01	58.4	13.4	3.8	32.22	13.48	9.44	0.28	5.726	1.462	2	74	81	169.8	109.06
R2	B7	Kolda	I06-03-F-A01	100.1	18	3.4	25.72	14.44	6.3	0.16	19.24	9.4	2	72	81	207.2	128.14
R3	B6	Kolda	I06-03-F-A01	37.52	14	3.6	32.2	13.18	7.28	0.28	6	4.22	2	68	85	80.8	124.24
R1	B4	Sinthiou2	I06-03-F-A01	14.54	23.2	4	26.54	12.92	7.8	0.26	1.58	1.1	3.6	94	113	36.8	177.2
R2	B7	Sinthiou2	I06-03-F-A01	15.62	17.4	3.4	33.6	13.3	8.5	0.24	1.02	0.72	3.4	92	113	18.8	177.4
R3	B6	Sinthiou2	I06-03-F-A01	13.46	18.6	3	39.3	11.5	6.9	0.2	0.48	0.28	3.2	93	110	12.2	160
R1	B3	Kolda	I06-05-F-A01	45.936	11.2	4	35.3	14.64	10.06	0.22	8.386	5.818	2	64	85	105.4	121.74
R2	B5	Kolda	I06-05-F-A01	28.64	12.8	3	25.62	12.5	7.12	0.28	5.26	3.28	2	68	81	104	116.14
R3	B7	Kolda	I06-05-F-A01	63.26	15.2	3.8	34.58	14.64	7.66	0.22	14.38	9.28	2	68	84	129	125.42
R1	B3	Sinthiou2	I06-05-F-A01	22.72	15.6	4	28.52	12.8	7.4	0.22	1.88	1.3	3.4	92	110	15.6	112
R2	B5	Sinthiou2	I06-05-F-A01	17.64	17	3.8	32.6	13.7	9.6	0.28	0.38	0.22	3.2	87	113	30	155.8
R3	B7	Sinthiou2	I06-05-F-A01	14.22	16.6	3.8	34.2	14.5	8.3	0.22	0.36	0.22	3.4	80	108	27.2	163.2
R1	B1	Kolda	I06-09-F-A01	86.76	12.6	3.6	30.94	14.12	5.575	0.175	14.262	8.3	2	74	78	223	130
R2	B3	Kolda	I06-09-F-A01	NA	15.8	3.2	31.46	14.74	6.64	0.26	NA	NA	2	68	82	31.2	123.64
R3	B2	Kolda	I06-09-F-A01	48.88	16.2	3.6	26.18	13.96	7.26	0.28	16.22	10.94	2	71	69	106.2	127.62
R1	B1	Sinthiou2	I06-09-F-A01	9.125	15.8	3.8	28.4	12.4	5	0.12	1.325	1	3	72	90	10.2	111
R2	B3	Sinthiou2	I06-09-F-A01	14.9	15.8	3.6	33.3	14.4	8.3	0.2	2.72	2.04	3.4	72	90	27	131
R3	B2	Sinthiou2	I06-09-F-A01	20.56	17.2	3.4	37.9	11.9	5.3	0.16	3.92	2.82	3.2	71	88	38.8	132.2
R1	B2	Kolda	I06-09-F-A02	46.6	15.8	3.8	31.94	14.34	7.98	0.26	15.2	11.14	2	74	82	115	124.74
R2	B8	Kolda	I06-09-F-A02	37.524	17.6	3.6	25.94	12.82	6.26	0.24	9.666	6.706	2	66	76	114.2	119.92
R3	B3	Kolda	I06-09-F-A02	57.152	19.2	3.4	24	13.48	6.66	0.14	10.09	6.13	2	76	88	134.6	118.14
R1	B2	Sinthiou2	I06-09-F-A02	25.28	23	3.2	25.1	12.8	6.3	0.16	1.06	0.64	3.4	104	116	29.8	147.2
R2	B8	Sinthiou2	I06-09-F-A02	23.364	19.2	3	24.2	12.9	6.3	0.18	1.104	0.564	3.6	98	108	28.4	156.6
R3	B3	Sinthiou2	I06-09-F-A02	26.08	20	3.6	31.5	13.7	7.9	0.2	1	0.52	3.4	94	113	29.2	159
R1	B5	Kolda	I07-03-F-A01	20.03	14.2	3.6	28.24	15.18	8.65	0.2	1.7	0.608	2	74	82	46	126.48
R2	B8	Kolda	I07-03-F-A01	64.556	17.8	3.2	25.78	13.44	7.02	0.2	10.602	5.398	2	74	83	166.6	110.98
R3	B7	Kolda	I07-03-F-A01	35.92	16.4	3.6	34.62	13.58	9.92	0.32	4.26	2.08	2	76	87	80.8	135.38
R1	B5	Sinthiou2	I07-03-F-A01	30.68	15.8	3.4	31.7	13.7	8.54	0.26	2.4	1.788	3.4	94	108	27.2	163.2
R2	B8	Sinthiou2	I07-03-F-A01	24.62	19.8	3.2	33.06	12.64	6.4	0.24	2.48	1.74	3.6	98	113	21.8	151.6
R3	B7	Sinthiou2	I07-03-F-A01	30.214	20.4	3.6	27.9	12.6	6.5	0.16	1.634	1.154	3.2	97	113	24.2	155.2
R1	B4	Kolda	I07-10-F-A01	37.64	13.8	3.4	29.94	14.88	7.28	0.26	4.88	3.34	2	77	81	95.4	121.18
R2	B1	Kolda	I07-10-F-A01	41.58	16.8	3	31.46	13.72	6.32	0.26	9.18	6	2	79	86	109.8	116.56
R3	B5	Kolda	I07-10-F-A01	31.48	17	3.6	28.42	14	8.92	0.32	5.8	2.98	2	75	89	84.8	118.36
R1	B4	Sinthiou2	I07-10-F-A01	26.53	21.2	4.4	24.2	14.1	9.9	0.38	1.322	0.8125	3.6	104	113	17.6	174.4
R2	B1	Sinthiou2	I07-10-F-A01	23.11	16.6	4.2	24.2	14.2	9.1	0.22	2.38	1.28	3.6	99	113	18.9	168.6
R3	B5	Sinthiou2	I07-10-F-A01	19.68	19.6	4	26.7	14	10.9	0.34	0.24	0.2	3.6	103	113	20.2	165.4
R1	B7	Kolda	I07-12-F-A01	148.475	14.2	3.4	28	12.66	4.02	0.2	48.8	20.635	2	70	81	307.6	114
R3	B8	Kolda	I07-12-F-A01	202.72	13.6	3.4	32.32	14.7	6.34	0.26	57.42	37.54	2	73	80	372	128.44
R3	B8	Sinthiou2	I07-12-F-A01	105	18	4	36	11	7	0.1	41.7	24.8	3	70	90	411	102
R1	B8	Kolda	L02-01-F-A01	17.9	8.6	3.6	30.58	12.46	3.975	0.25	9.58	6.38	2	55	72	77.8	85.18
R2	B1	Kolda	L02-01-F-A01	6.3	10.6	4	29.3	11.86	3.88	0.22	3	2.22	2	56	69	18.4	88.8
R3	B4	Kolda	L02-01-F-A01	5.72	10.4	3	31.38	14.2	4.6	0.18	3.44	2.34	2	56	68	27.6	95.54
R1	B8	Sinthiou2	L02-01-F-A01	12.1	14.6	4.8	23.84	11.32	6.32	0.2	3.06	2.46	3.6	56	70	17.8	123.4
R2	B1	Sinthiou2	L02-01-F-A01	5.9	13.6	4	22.26	11.32	6.72	0.2	1.58	1.24	3.2	57	71	10.8	102.6
R3	B4	Sinthiou2	L02-01-F-A01	6.68	13.4	3.4	22.74	11.28	7.24	0.24	1.1	0.84	3	56	69	13.2	106.4
R1	B2	Kolda	L02-05-F-A01	23.2	13	4	29.62	12.36	5.8	0.25	9.96	6.68	2	62	74	47	103.6
R2	B3	Kolda	L02-05-F-A01	NA	13	4.6	21.84	11.34	4.4	0.34	NA	NA	2	58	68	35.2	84.8
R3	B5	Kolda	L02-05-F-A01	25.42	11.8	3.6	23.8	13.16	4.05	0.125	10.92	7.4	2	56	68	46	95.24
R1	B2	Sinthiou2	L02-05-F-A01	13.62	12.8	4	23.5	10.32	5.54	0.12	3.62	2.72	3.4	58	73	19.6	104
R2	B3	Sinthiou2	L02-05-F-A01	12.1	10.6	3.8	28.24	12.86	6.58	0.24	4.28	3.38	3.6	58	71	26.6	105.8
R3	B5	Sinthiou2	L02-05-F-A01	NA	15.2	3.8	29.52	12.04	7.5	0.3	NA	3.05	3.2	57	71	14.8	113.8
R1	B3	Kolda	L02-07-F-A01	55.08	9.2	3.4	33.68	13.72	6.64	0.28	21.84	15	2	55	76	146.8	99.54
R2	B2	Kolda	L02-07-F-A01	NA	10.8	3.2	27.7	12.42	4.72	0.1	NA	NA	2	55	89	112.2	90.9
R3	B2	Kolda	L02-07-F-A01	18.56	11.6	3.6	27.8	12.86	4.44	0.22	8.18	6.02	2	56	72	77.6	93.6
R1	B3	Sinthiou2	L02-07-F-A01	19.02	13.4	4.4	24.2	11.52	5.24	0.14	5	3.5	3.8	58	71	30.2	94.8
R2	B2	Sinthiou2	L02-07-F-A01	19.28	14.6	4	28.4	12.86	6.5	0.28	4.88	3.32	3.6	57	72	34.4	116
R3	B2	Sinthiou2	L02-07-F-A01	16.64	14.8	4.4	22.8	11.9	6.46	0.24	4.72	3.48	3.6	58	72	33.6	109.6
R1	B1	Kolda	L02-08-F-A01	66.94	17.4	4.2	28.46	13.58	8.34	0.36	22.38	14.44	2	64	72	33.4	92.25
R2	B7	Kolda	L02-08-F-A01	6.93	12	3.4	28.76	11.8	3.74	0.14	2.976	2.354	2	58	72	27	84.9
R3	B5	Kolda	L02-08-F-A01	11.18	12	3.6	29.06	11.74	4.96	0.22	5.04	3.2	2	56	68	39.8	99.6
R1	B1	Sinthiou2	L02-08-F-A01	11.1	13.2	4	29.4	12.52	6	0.24	3.22	2.46	3.8	57	72	15.6	111
R2	B7	Sinthiou2	L02-08-F-A01	13.44	16.8	3.6	20.38	12.16	6.62	0.18	3.32	2.5	3.4	56	71	24.6	118.8
R3	B5	Sinthiou2	L02-08-F-A01	8.34	12.8	3.8	20.74	11.48	7.14	0.22	2.68	2.12	3.4	56	69	14	113.2
R1	B1	Kolda	L03-08-F-A01	55.24	16.2	3.8	24.34	13.12	7.3	0.26	10.14	6.7	2	62	80	145	124.12
R3	B3	Kolda	L03-08-F-A01	55.24	13	4	26.9	9.7	6.7	0.2	11	5.35	2	67	76	145	102
R3	B3	Sinthiou2	L03-08-F-A01	60.8	17.5	5	35.25	13	5.25	0.25	9.85	4.9	3.5	67	82	226	102
R1	B8	Kolda	L04-01-F-A01	20.222	10.2	3	33.98	12.32	4.3	0.18	7.018	3.998	2	64	72	101.2	96.72
R2	B3	Kolda	L04-01-F-A01	NA	14.4	3.4	33.54	12.14	4.64	0.16	NA	NA	2	58	75	192.6	106.08
R3	B6	Kolda	L04-01-F-A01	28.88	12.2	3.25	31.38	13.86	4.54	0.17	12.44	8.98	2	56	68	89.8	101.8
R1	B8	Sinthiou2	L04-01-F-A01	10.08	15.4	4.2	21.22	11.66	5.7	0.2	1.96	1.52	3.2	57	71	15.6	104.4
R2	B3	Sinthiou2	L04-01-F-A01	6.36	13	4.4	29.4	13.04	8.52	0.26	1.86	1.44	3.8	57	71	15	114.6
R3	B6	Sinthiou2	L04-01-F-A01	15.76	14.8	4.2	22.4	12.04	8.92	0.18	3.68	2.66	3.6	57	71	28	112.6
R1	B6	Kolda	L04-02-F-A01	42.186	13	4	28.98	13.84	5.7	0.24	12.888	8.052	2	56	72	133	110.6
R2	B3	Kolda	L04-02-F-A01	NA	13.8	3.4	24.08	11.68	4.68	0.22	NA	NA	2	64	77	125	97.96
R3	B3	Kolda	L04-02-F-A01	134.82	15	2.8	32.72	13.06	4.78	0.14	12.44	9	2	68	77	129	113.5
R1	B6	Sinthiou2	L04-02-F-A01	31.642	13.2	3.4	33	11.5	5.54	0.12	8.064	5.376	3.2	79	94	135.8	102.2
R2	B3	Sinthiou2	L04-02-F-A01	17.54	14.2	4.2	31	10.7	6.9	0.22	4.8	2.8	3.2	79	94	140.3	104.2
R3	B3	Sinthiou2	L04-02-F-A01	31.8	14	4.2	34.4	11.9	5.2	0.2	9.58	6.34	3	79	94	144.8	101
R1	B8	Kolda	L05-01-F-A01	23.14	11.6	3.8	26.9	12.66	5	0.26	9.76	6.72	2	56	72	53.4	94.44
R2	B5	Kolda	L05-01-F-A01	11.62	12.2	2.6	28.64	11.4	4.22	0.26	5.48	3.98	2	58	73	40.8	90.28
R3	B2	Kolda	L05-01-F-A01	60.76	14.6	3.8	24.84	10.9	3.66	0.18	21.76	15.56	2	64	76	47.1	99.22
R1	B8	Sinthiou2	L05-01-F-A01	14.204	16	3.8	25.74	11.64	6.1	0.14	4.25	3.402	3.8	57	72	21.4	127.6
R2	B5	Sinthiou2	L05-01-F-A01	12.38	12.4	4	30.42	11.32	5.82	0.16	2.88	1.84	3	57	71	18.2	122.4
R3	B2	Sinthiou2	L05-01-F-A01	21.02	16	3.2	24.5	10.92	4.1	0.14	5.7	3.96	3.4	57	71	30.8	115.4
R1	B7	Kolda	L06-01-F-A01	12.12	10.2	3.4	32.34	13.94	3.56	0.12	5.24	3.78	2	58	68	42.8	94.02
R2	B8	Kolda	L06-01-F-A01	13.2	10.6	4	31.18	12.94	4.92	0.24	2.844	1.868	2	56	68	47.2	102
R3	B3	Kolda	L06-01-F-A01	83.92	15.2	3.6	34.36	13.46	5.84	0.24	23.34	14.82	2	57	68	45	114.8
R1	B7	Sinthiou2	L06-01-F-A01	15.66	14	4	30.4	11.7	6.24	0.18	4.8	3.6	3.6	58	71	31	118.4
R2	B8	Sinthiou2	L06-01-F-A01	16.8	16	4.2	29.54	12.24	6.04	0.24	5.04	3.68	3.6	58	71	21	115.8
R3	B3	Sinthiou2	L06-01-F-A01	5.4	11.6	4.2	27.8	11.72	6.46	0.24	1.22	0.96	3	57	70	9.8	104.8
R1	B2	Kolda	L06-02-F-A01	39.2	13.4	3.6	24.95	11.58	4.14	0.17	15.6	11.14	2	64	68	102.8	103
R2	B8	Kolda	L06-02-F-A01	NA	11.2	3.6	25.8	12.7	4.12	0.2	NA	NA	2	56	68	65.8	87.1
R3	B5	Kolda	L06-02-F-A01	30.28	13.4	4	27.74	12.92	4.22	0.14	12.7	9.28	2	58	73	110.4	93.2
R1	B2	Sinthiou2	L06-02-F-A01	16.96	13.2	3.6	22.46	11.96	4.8	0.12	3.9	2.96	3.6	57	73	21.2	107
R2	B8	Sinthiou2	L06-02-F-A01	21.26	13.4	3.6	26.5	11.78	6.44	0.22	5.6	4.02	3.2	56	69	33.2	113.2
R3	B5	Sinthiou2	L06-02-F-A01	12.46	16.2	3.2	18.14	11.06	5.42	0.16	2.58	1.86	3.2	58	72	21	118.6
R1	B7	Kolda	M01-02-F-A01	49.396	12.8	3.4	35.74	12.62	4.4	0.2	11.116	5.648	2	61	80	183.2	94.47
R2	B1	Kolda	M01-02-F-A01	10.49	12.2	3.4	31.46	11.06	5.14	0.22	4.628	3.414	2	58	72	192.2	73.66
R3	B7	Kolda	M01-02-F-A01	56.64	12.8	3.2	33.56	11.76	4.94	0.18	18.84	10.14	2	64	77	201.2	94.2
R1	B7	Sinthiou2	M01-02-F-A01	11.36	15.6	4	35.82	12.86	6.68	0.22	2.98	2.3	3.4	64	74	14.2	141.8
R2	B1	Sinthiou2	M01-02-F-A01	10.38	16.6	3.2	32.54	12.96	7.24	0.24	2.74	2.02	3.2	63	74	21.6	137.4
R3	B7	Sinthiou2	M01-02-F-A01	11.84	16	3.2	29.5	11.88	6.5	0.26	2.6	1.7	3.2	63	76	21.2	127.6
R1	B3	Kolda	M01-07-F-A01	59.314	12.8	3.8	32.42	12.76	6.18	0.3	10.44	6.912	2	62	72	137.6	120.22
R2	B5	Kolda	M01-07-F-A01	16.08	13.8	3	35.02	12.48	4.8	0.16	6.54	4.5	2	63	75	62.2	105.08
R3	B7	Kolda	M01-07-F-A01	29.12	13.4	3.4	37.7	12.66	5.7	0.26	6.98	4.56	2	58	72	78.2	117.54
R1	B3	Sinthiou2	M01-07-F-A01	29.06	16.6	3.6	24.66	10.5	5.06	0.22	6.78	4.68	3.4	63	75	41.2	118.4
R2	B5	Sinthiou2	M01-07-F-A01	9.96	17.8	3.66667	30.36	13.36	7.2	0.2	2.28	1.7	4	64	75	20.4	131
R3	B7	Sinthiou2	M01-07-F-A01	19.38	14.8	4	36.74	13.14	6.74	0.26	5.36	3.9	3.6	63	75	35.2	141.4
R1	B2	Kolda	M01-09-F-A01	46.62	16.8	4	21.66	11.92	7.84	0.38	10.12	5.8	2	58	68	90	132.82
R2	B2	Kolda	M01-09-F-A01	NA	11	3	34.42	11.98	5.74	0.26	NA	NA	2	61	72	54.2	97.04
R3	B6	Kolda	M01-09-F-A01	17.8	12.6	2.8	34.54	14.4	6.74	0.34	7.08	5.04	2	63	72	46.8	109.12
R1	B2	Sinthiou2	M01-09-F-A01	13.072	14.8	3.4	30.2	13.56	6.2	0.2	2.86	2.098	3.6	65	77	20.8	119
R2	B2	Sinthiou2	M01-09-F-A01	6.952	14.8	3.2	30.8	12.88	5.54	0.2	1.596	1.198	3.4	64	74	15	136.2
R3	B6	Sinthiou2	M01-09-F-A01	11.8	19.6	3.2	24.42	13.1	6.72	0.34	1.78	1.36	3.2	63	74	13.4	148.75
R1	B3	Kolda	M01-12-F-A01	20.7	12.2	3.4	35.16	14.86	7.32	0.3	6.4	4.54	2	64	72	54.6	115.64
R2	B2	Kolda	M01-12-F-A01	NA	12	3.4	32.62	13.24	5.14	0.26	NA	NA	2	61	72	39.4	91.98
R3	B3	Kolda	M01-12-F-A01	18.41	13.6	3.4	33.66	13.66	5.8	0.2	5.002	3.788	2	62	75	58.8	106
R1	B3	Sinthiou2	M01-12-F-A01	14.22	16.6	3.8	37.6	11.06	5.86	0.26	3.24	2.48	3.4	63	75	32.6	130
R2	B2	Sinthiou2	M01-12-F-A01	15.4	16	3.6	30.1	12.12	5.6	0.22	3.06	2.38	3.2	64	76	21.6	115.4
R3	B3	Sinthiou2	M01-12-F-A01	10.56	14.2	3.8	31.5	14	7.68	0.2	1.96	1.4	3	63	75	11	121.2
R1	B8	Kolda	M02-05-F-A01	60.12	12.6	3	29.32	11.68	3.96	0.14	20.28	10.92	2	62	80	221.2	100.6
R2	B3	Kolda	M02-05-F-A01	NA	12.6	3.6	31.28	12.56	5.32	0.32	NA	NA	2	62	72	17.6	100
R3	B3	Kolda	M02-05-F-A01	20.22	12.8	3.2	28.18	14.26	5.48	0.14	6.6	4.64	2	61	72	95.2	103.08
R1	B8	Sinthiou2	M02-05-F-A01	16	16.8	3.8	30.5	12.8	6.64	0.24	2.06	1.48	3.2	61	73	14.6	139.2
R2	B3	Sinthiou2	M02-05-F-A01	15.74	16	4.6	29.28	12.32	6.44	0.28	2.62	1.78	3.8	63	75	24.2	131
R3	B3	Sinthiou2	M02-05-F-A01	10.74	15.2	3.6	34.9	13.06	7.86	0.22	1.94	1.58	3.6	63	75	13.6	119.2
R1	B8	Kolda	M02-07-F-A01	47.124	10.8	3	35.68	11.84	4.26	0.1	19.208	12.344	2	62	72	110.4	98.18
R2	B3	Kolda	M02-07-F-A01	20.198	14	3.6	37.02	12.8	5.46	0.28	8.696	6.086	2	62	72	50.4	121.08
R3	B6	Kolda	M02-07-F-A01	18.06	11.2	3.4	26.7	14.3	7.34	0.3	4.48	3	2	58	72	48.6	101.96
R1	B8	Sinthiou2	M02-07-F-A01	12.66	16.8	4.4	25.58	12.7	6.92	0.32	2.48	1.98	3.4	62	75	16.6	134.8
R2	B3	Sinthiou2	M02-07-F-A01	7.436	14.6	3.8	29.5	12.78	7.5	0.28	1.548	1.178	3.6	62	74	11.8	135.2
R3	B6	Sinthiou2	M02-07-F-A01	20.46	17	4.6	29.64	12.34	8.9	0.28	5.76	4.42	3.8	62	73	24	141.8
R1	B6	Kolda	M02-09-F-A01	30.714	14.6	3.2	25.44	14.5	7.24	0.24	9.606	6.362	2	64	72	86.6	111.16
R2	B1	Kolda	M02-09-F-A01	NA	13.4	3.4	34.94	14.675	5.72	0.26	NA	NA	2	62	72	49.8	116.02
R3	B8	Kolda	M02-09-F-A01	28.44	15.6	3.2	24.34	14.49	5.8	0.125	7.32	4.76	2	63	76	69.6	101.88
R1	B6	Sinthiou2	M02-09-F-A01	28.92	17.4	4.4	34.2	14.18	8.94	0.3	6.82	4.94	3.6	62	76	29.2	179.6
R2	B1	Sinthiou2	M02-09-F-A01	10.42	15.2	4.6	29.98	12.8	6.96	0.26	2.2	1.56	3.4	62	74	25.2	131.6
R3	B8	Sinthiou2	M02-09-F-A01	20.32	18.4	4.4	32.8	11.56	7.9	0.24	3.92	2.84	3.4	62	75	32.4	134.8
R1	B8	Kolda	M02-11-F-A01	51.96	16.6	3.6	32.7	14.44	5.54	0.14	10.66	7.12	2	64	77	168	127.78
R2	B6	Kolda	M02-11-F-A01	26.36	16.6	4.2	33.28	14.24	5.86667	0.325	9.88	7.16	2	64	73	84	128.92
R3	B5	Kolda	M02-11-F-A01	14.98	13.2	3.2	31.06	12.96	5.86	0.2	4	2.78	2	62	73	47.2	104.6
R1	B8	Sinthiou2	M02-11-F-A01	13.394	17.6	3.8	32.6	14.2	5.8	0.22	2.712	2.124	3.6	70	88	20.6	154.2
R2	B6	Sinthiou2	M02-11-F-A01	25.04	20.2	4	31.8	13.36	8.5	0.26	3.94	3	3.2	70	84	36	165.4
R3	B5	Sinthiou2	M02-11-F-A01	26.92	14.8	4.2	36.4	13.5	9.6	0.26	5	3.82	3.4	70	83	36.8	144.6
R1	B5	Kolda	M03-01-F-A01	37.388	15	4.2	23	12.7	3.7	0.22	9.484	6.388	2	61	72	97.8	103.84
R2	B4	Kolda	M03-01-F-A01	15.62	13.4	3.8	28.3	11.7	5	0.26	7.28	5.2	2	58	72	54	95.1
R3	B8	Kolda	M03-01-F-A01	21.38	11.2	3.6	30.2	13.44	5.12	0.22	8.78	6.06	2	56	68	64.4	94.38
R1	B5	Sinthiou2	M03-01-F-A01	19.76	15.8	4.6	24.5	12.28	5.94	0.2	5.56	4.18	3.6	58	73	23.8	126
R2	B4	Sinthiou2	M03-01-F-A01	15.88	16.8	4.4	23.16	13.04	9.26	0.26	4.06	2.8	3.2	58	71	22.6	128
R3	B8	Sinthiou2	M03-01-F-A01	22.06	17.4	3.4	29.34	11.74	5.26	0.28	5.48	3.82	3.8	57	71	22	132.8
R1	B5	Kolda	M03-06-F-A01	50.566	18.4	3.4	21.3	12.92	6.36	0.3	16	11.262	2	61	68	131.8	111.3
R2	B5	Kolda	M03-06-F-A01	12.94	13.6	3.2	30.66	11.56	4.68	0.24	5.94	4.52	2	62	64	44.4	96.3
R3	B1	Kolda	M03-06-F-A01	11.466	12	3	25.76	12.18	6.1	0.3	3.878	3.166	2	64	75	49	91.96
R1	B5	Sinthiou2	M03-06-F-A01	18.4	21.2	3.6	26.3	11	6.94	0.26	3.8	2.9	3.2	69	84	19.4	141.4
R2	B5	Sinthiou2	M03-06-F-A01	15	22.2	3.6	32.7	11.5	6.28	0.24	3.5	2.6	3.4	70	84	27.6	152.6
R3	B1	Sinthiou2	M03-06-F-A01	10.06	18	3.8	31.96	11.04	6.3	0.22	2.02	1.64	4	69	84	17.8	123.6
R1	B8	Kolda	M03-07-F-A01	43.09	13.2	2.8	28.86	12.68	4.32	0.14	15.004	9.604	2	64	77	135.6	96.78
R2	B1	Kolda	M03-07-F-A01	87.48	15.8	3.6	33.78	14.2	7.825	0.325	19.26	4.54	2	74	81	97.7	121.86
R3	B7	Kolda	M03-07-F-A01	19.1	16.2	3	33.54	14.42	5.34	0.24	5.12	3	2	68	76	60.4	116.2
R1	B8	Sinthiou2	M03-07-F-A01	24.444	21.2	4	38	12.1	6.6	0.2	2.764	2.068	3	76	97	26.6	147.6
R2	B1	Sinthiou2	M03-07-F-A01	10.66	18.4	3.4	28.8	12.26	5.92	0.2	1.84	1.44	3.4	73	88	14.8	125.6
R3	B7	Sinthiou2	M03-07-F-A01	22.02	20	2.8	36	12	6.6	0.22	1.08	0.7	3.4	79	108	26.8	137.4
R1	B4	Kolda	M03-07-F-A02	29.28	17.8	3.4	28.58	13.78	5.96	0.18	7.2	4.52	2	64	72	80	123.04
R2	B2	Kolda	M03-07-F-A02	16.32	16.6	3.6	23.7	13.18	4.54	0.2	4.96	3.5	2	64	76	57.8	99.78
R3	B8	Kolda	M03-07-F-A02	26	16.2	3.6	27.36	11.62	4.6	0.225	11.12	6.06	2	68	76	88.4	102.88
R1	B4	Sinthiou2	M03-07-F-A02	21.58	22	3	31.7	14.84	7.36	0.2	2.16	1.54	3.6	73.5	113	14.4	163.4
R2	B2	Sinthiou2	M03-07-F-A02	26.96	18.8	4	31.82	13.56	8.8	0.26	1.52	1.18	3.4	72	96	52.2	140
R3	B8	Sinthiou2	M03-07-F-A02	20.68	23.2	3.4	32	12.7	5.2	0.1	2.3	1.6	3.6	75	108	26.6	171.6
R1	B3	Kolda	M03-08bis-F-A01	26.686	14.6	3.8	22.46	12.08	6.38	0.28	7.372	5.246	2	62	72	80.2	102.48
R2	B3	Kolda	M03-08bis-F-A01	NA	16.2	3.8	29.86	11.92	4.62	0.3	NA	NA	2	64	77	66.8	112.9
R3	B4	Kolda	M03-08bis-F-A01	35.3	15	4	31.14	11.68	5.58	0.18	15.42	10.3	2	55	72	127	110.3
R1	B3	Sinthiou2	M03-08bis-F-A01	21.862	21	3.2	27.44	12.2	4.56	0.18	3.134	2.18	3	70	86	43.6	128.8
R2	B3	Sinthiou2	M03-08bis-F-A01	10.244	18.4	3.6	33.7	12.16	7.9	0.18	1.864	1.42	3.4	69	84	13.2	136.6
R3	B4	Sinthiou2	M03-08bis-F-A01	18.06	19.4	3.8	32.2	12.2	7.2	0.16	3.04	2.26	3.4	69	83	40	143.2
R1	B4	Kolda	M04-09-F-A01	22.856	10.2	3.2	36.34	13.72	3.94	0.14	9.686	6.49	2	60	82	94.4	97.66
R2	B7	Kolda	M04-09-F-A01	17.736	11.4	3.6	30.2	14.28	4.2	0.3	7.216	5.262	2	61	72	71.2	96.88
R3	B5	Kolda	M04-09-F-A01	41.28	14.2	3.6	31.9	14	4.46	0.26	12.9	8	2	58	72	137.8	117
R1	B4	Sinthiou2	M04-09-F-A01	13.44	13.6	4	28.36	12.94	7.14	0.22	3.04	2.32	3.6	59	73	13.6	123.2
R2	B7	Sinthiou2	M04-09-F-A01	9.26	16	4	33.9	12.38	5.44	0.18	2.34	1.76	3.6	62	73	13	126
R3	B5	Sinthiou2	M04-09-F-A01	11.54	16	3.4	29.6	12.34	6.4	0.26	2.38	1.82	3.4	63	73	19.4	136.4
R1	B7	Kolda	M05-01-F-A01	70.08	14.2	4	31.12	12.18	4.88	0.24	13.52	8.88	2	66	78	224.4	114.74
R2	B6	Kolda	M05-01-F-A01	24.82	13.4	3.4	31.24	13.32	4.76	0.24	8.346	6.2575	2	64	75	68	106.32
R3	B5	Kolda	M05-01-F-A01	15.4	13	3.6	29	14.46	6.008	0.24	3.76	2.6	2	63	73	59.8	107.8
R1	B7	Sinthiou2	M05-01-F-A01	9.8	17.9	3.4	23.98	14.06	8.14	0.24	3.56	2.4	3.6	68	82	57.4	152.6
R2	B6	Sinthiou2	M05-01-F-A01	5.82	14.2	3.6	31.8	13.96	9	0.24	1.14	0.88	3.4	69	82	9.6	143.4
R3	B5	Sinthiou2	M05-01-F-A01	13.78	14.2	3.6	36.54	13.8	8.26	0.28	2.8	2.14	3	71	86	26.8	148.2
R1	B2	Kolda	M05-02-F-A01	18.42	13.4	3.6	37.6	13.98	8	0.24	6.4	4.66	2	64	72	48	128.74
R2	B7	Kolda	M05-02-F-A01	23.6	15.8	3.4	30.68	14.32	5.34	0.3	4.94	3.12	2	64	75	87.6	113.2
R3	B4	Kolda	M05-02-F-A01	14.78	12.8	3.4	30.56	13.4	5.54	0.24	4.56	2.46	2	64	75	43	100.92
R1	B2	Sinthiou2	M05-02-F-A01	9.496	18.2	3.4	29.4	11.32	5.66	0.26	1.948	1.508	3.8	70	84	13.4	137
R2	B7	Sinthiou2	M05-02-F-A01	12.86	16.4	4.2	32.2	12.34	9.3	0.24	2.62	2.06	3.6	71	89	18.4	147.8
R3	B4	Sinthiou2	M05-02-F-A01	12.64	16.8	3.6	38.9	13.4	9.94	0.22	2.86	2.22	3.8	70	84	20.6	154.2
R1	B8	Kolda	M05-03-F-A01	26.25	14	4.2	29.4	14.28	5.92	0.22	7.08	4.288	2	64	77	83.6	104.34
R2	B6	Kolda	M05-03-F-A01	12.374	14.6	4	30.36	13	7.52	0.34	3.33	2.344	2	64	73	35.8	116.34
R3	B6	Kolda	M05-03-F-A01	54.54	11.6	3.2	40.64	14.94	6.82	0.2	11.72	7.28	2	64	76	145.8	117.04
R1	B8	Sinthiou2	M05-03-F-A01	15.44	17.6	3.2	31.7	13.7	5.4	0.22	2.38	1.92	3.2	70	90	15.4	152.4
R2	B6	Sinthiou2	M05-03-F-A01	19.492	20.2	4.4	37	13.44	7.8	0.26	4.486	2.824	3.4	71	82	26.2	158.4
R3	B6	Sinthiou2	M05-03-F-A01	14.056	16.4	3.8	31.9	11.48	7.8	0.22	2.616	2.06	3.2	71	90	14.6	140.2
R1	B4	Kolda	M05-03-F-A02	65.652	14	3.8	30.3	13.34	8.9	0.36	18.108	12.524	2	64	72	190	109.56
R2	B3	Kolda	M05-03-F-A02	NA	17.4	3.2	28.2	13.06	5.12	0.22	NA	NA	2	64	77	180.4	124.62
R3	B7	Kolda	M05-03-F-A02	29.12	14.6	3.4	30.26	13	5.88	0.16	7.5	5.14	2	64	76	78.4	114.92
R1	B4	Sinthiou2	M05-03-F-A02	13.94	16.8	4	36.08	13.66	7.96	0.26	1.66	1.16	3.4	71	90	19.2	156.2
R2	B3	Sinthiou2	M05-03-F-A02	21.5	20.2	3.6	31.2	12.66	6.9	0.2	2.58	1.84	3	71	88	24.6	141.2
R3	B7	Sinthiou2	M05-03-F-A02	26.332	20	3.4	36.4	13.86	7.84	0.22	6.28	4.946	3.6	70	86	37	173.4
R1	B2	Kolda	M05-06-F-A01	41.56	13.6	4	32.76	13.36	10.56	0.38	13.16	9.22	2	64	72	104.8	134.04
R2	B1	Kolda	M05-06-F-A01	94.94	17.2	2.8	29.94	11.56	3.78	0.1	20.92	5.66	2	66	77	100	117.04
R3	B2	Kolda	M05-06-F-A01	19.474	12.4	3.6	33.46	14.74	6.76	0.22	5.27	3.7725	2	61	75	74.6	117.42
R1	B2	Sinthiou2	M05-06-F-A01	11.83	15	4.2	30.5	13.52	7.2	0.28	3.782	2.606	3.6	66	80	24	112.6
R2	B1	Sinthiou2	M05-06-F-A01	11.634	15	4	32.1	13.7	6.5	0.24	1.954	1.546	3.6	66	79	23.4	129.4
R3	B2	Sinthiou2	M05-06-F-A01	11.856	17.2	3.4	34.2	12.52	6.54	0.24	2.744	2.144	3.8	66	79	15.6	138.8
R1	B6	Kolda	M05-10-F-A01	27.908	15.6	2.8	32.76	13.2	5.82	0.24	3.586	1.78	2	64	75	95	136.02
R2	B7	Kolda	M05-10-F-A01	24.14	17.4	3.4	27.48	13.38	5.74	0.2	6.54	4.54	2	64	73	82.6	114.6
R3	B2	Kolda	M05-10-F-A01	33.86	15.8	3.2	28.22	11.62	4.26	0.14	9.22	6.6	2	64	73	113	116.82
R1	B6	Sinthiou2	M05-10-F-A01	20.22	19.6	3.6	31.1	12.5	5.48	0.16	2.62	2.06	3.2	73	92	19.4	179.8
R2	B7	Sinthiou2	M05-10-F-A01	12.3	18.6	3.4	24.46	12	6.3	0.18	1.74	1.26	3.4	74	94	17.2	153.6
R3	B2	Sinthiou2	M05-10-F-A01	19.64	15	3.8	33.8	13.86	7.3	0.22	3.476	3.288	3.4	73	80	24	154
R1	B2	Kolda	M05-11-F-A01	56.3	15	4	30.92	12.92	8.175	0.28	17.7	11.7	2	64	76	108.4	134.34
R2	B2	Kolda	M05-11-F-A01	NA	13.4	3.2	35.9	13.58	5	0.18	NA	NA	2	64	77	73.8	110.72
R3	B6	Kolda	M05-11-F-A01	28.2	14.4	3.6	30.68	14.1	7.125	0.24	6.34	4.5	2	65	76	63.4	117.6
R1	B2	Sinthiou2	M05-11-F-A01	6.78	17.2	3	26.5	11.6	4.76	0.16	1.14	0.96	3.2	74	92	10.4	137.6
R2	B2	Sinthiou2	M05-11-F-A01	25.56	16.2	3.8	32.9	13.6	8.3	0.24	4.64	3.46	3.8	74	92	26.4	170
R3	B6	Sinthiou2	M05-11-F-A01	23.52	19	3.4	31.24	13.2	9.24	0.34	4.64	3.22	3.2	72	88	32	150.2
R1	B1	Kolda	M06-02-F-A01	57.14	17.8	3.6	33.54	14.14	9.62	0.24	16.7	11.1	2	64	72	147.2	153.8
R2	B3	Kolda	M06-02-F-A01	6.944	16.4	3.4	29.18	13.14	4.5	0.22	1.88	1.166	2	64	77	23.8	111.36
R3	B3	Kolda	M06-02-F-A01	30.56	13	3.4	29.4	13.42	6.6	0.26	9.104	6.352	2	64	72	88.6	106.82
R1	B1	Sinthiou2	M06-02-F-A01	34.02	21.2	4.2	27.8	12.74	4.94	0.2	2.439	5.22	3.2	70	88	32.4	113.2
R2	B3	Sinthiou2	M06-02-F-A01	23.39	18.4	3.2	27	14	7.08	0.28	2.52	1.894	3.6	71	82	17.4	136
R3	B3	Sinthiou2	M06-02-F-A01	9.878	15.6	4.2	39.56	14.5	8.5	0.18	2.358	1.826	3.6	69	82	14.2	151.8
R1	B6	Kolda	M06-04-F-A01	49.42	11.8	4.4	28.28	13.06	6.2	0.18	7.86	5.68	2	56	68	72.6	112.6
R2	B6	Kolda	M06-04-F-A01	48.704	13.8	3.8	31.24	13.04	5.42	0.2	18.552	13.364	2	58	72	133.8	91.84
R3	B8	Kolda	M06-04-F-A01	55.32	13.6	3.8	25.32	13.98	5.78	0.24	18.94	13.28	2	56	68	122	95.42
R1	B6	Sinthiou2	M06-04-F-A01	13.38	16.6	4.4	24.3	13.42	6.52	0.16	3.06	2.18	3.6	58	72	20	126.2
R2	B6	Sinthiou2	M06-04-F-A01	10.08	12.4	3.8	26.54	11.7	8.36	0.2	2.96	2.18	2.6	57	72	12.6	118.4
R3	B8	Sinthiou2	M06-04-F-A01	11.2	13.6	4.2	26.62	12.48	8.96	0.32	2.58	1.9	3.2	57	71	21	107.4
R1	B6	Kolda	M06-05-F-A02	27.832	13.2	4	31.92	15.64	8.14	0.26	10.432	7.774	2	64	75	67	109.58
R2	B6	Kolda	M06-05-F-A02	44.858	18.6	3	27.96	13.14	4.2	0.18	17.804	12.552	2	71	81	145.8	117.16
R3	B4	Kolda	M06-05-F-A02	28.04	12.4	3.4	30.98	14.26	5.26	0.22	6.7	4.54	2	64	75	71.6	101.18
R1	B6	Sinthiou2	M06-05-F-A02	13.006	13	4.2	37.3	14.14	8.64	0.28	1.942	1.522	3.6	69	82	25.4	149.6
R2	B6	Sinthiou2	M06-05-F-A02	19.2	21	3.8	31.66	12.26	7.5	0.18	3.02	2.28	3.2	70	86	25.4	137.8
R3	B4	Sinthiou2	M06-05-F-A02	10.944	17.8	3.4	27.34	10.9	5.6	0.24	1.6	1.25	3.2	70	82	18.8	137.2
R1	B5	Kolda	M06-07-F-A01	31.44	17.6	3.8	33.88	15.32	7.92	0.3	9.568	6.4	2	65	80	73.4	142.72
R2	B7	Kolda	M06-07-F-A01	52.32	20.6	3.6	23.16	13.74	5.42	0.3	14.96	10.3	2	66	76	206.2	123.78
R3	B1	Kolda	M06-07-F-A01	41.88	22	3	26.8	11.3	5	0.3	15.8	8.35	2	68	85	NA	137.8
R1	B5	Sinthiou2	M06-07-F-A01	12.14	18.6	3.8	33	13.7	7.64	0.24	4.2	1.64	3.2	70	88	19.4	152.6
R2	B7	Sinthiou2	M06-07-F-A01	11.34	17	3.6	32.92	12.7	6.1	0.22	2.2	1.8	3.2	70	82	17.8	154.8
R3	B1	Sinthiou2	M06-07-F-A01	8.68	16	4.2	34.1	12.3	10.6	0.26	1.6	1.34	3.6	70	80	13.2	144
R1	B5	Kolda	M07-03-F-A01	29.648	14	4	29.54	11.75	5.9	0.22	9.112	6.192	2	56	68	67.6	102.28
R2	B6	Kolda	M07-03-F-A01	35.44	13.6	3.2	26.36	11.18	3.82	0.18	18.86	14.88	2	58	73	140.2	87.34
R3	B2	Kolda	M07-03-F-A01	16.42	11.2	3.8	26.24	12.9	4.58	0.26	6.88	4.9	2	56	68	49.4	88.24
R1	B5	Sinthiou2	M07-03-F-A01	26.6	17	5.2	24.5	12.02	8.2	0.18	2.86	2.25	3.6	56	70	38.8	98.694
R2	B6	Sinthiou2	M07-03-F-A01	12.18	17.4	4.4	25.1	12.8	7.76	0.24	3.58	2.84	3.8	55	71	21.6	120
R3	B2	Sinthiou2	M07-03-F-A01	10.9	15.4	4	28.36	10.5	7.08	0.22	2.14	1.66	3.2	55	70	27.4	120.4
R1	B7	Kolda	M07-04-F-A01	12.86	9.8	3.6	33.94	13.72	4.7	0.22	4.606	3.368	2	56	68	44.6	97
R2	B4	Kolda	M07-04-F-A01	23.7	13.8	4.6	24.86	12	4.06	0.2	9.54	7.32	2	56	72	77.6	101.28
R3	B6	Kolda	M07-04-F-A01	17.48	11.2	3.75	28.86	10.98	4.5	0.22	6.3	4.52	2	56	68	48.4	91.22
R1	B7	Sinthiou2	M07-04-F-A01	14.4	14	5.4	27.54	12.5	7.54	0.2	3.36	2.7	3.2	56	70	27.6	125.4
R2	B4	Sinthiou2	M07-04-F-A01	17.6	14.8	3.6	25.04	12.28	6.6	0.22	4.4	3.4	3	56	71	39.2	116.2
R3	B6	Sinthiou2	M07-04-F-A01	13.46	13.2	3.2	20.1	12.64	7.02	0.2	3.7	2.6	3.6	56	70	18	115.6
R1	B5	Kolda	M07-06-F-A01	18.722	13	4	26.32	13.38	4.9	0.24	5.878	4.06	2	56	68	43.6	117.5
R2	B2	Kolda	M07-06-F-A01	NA	13.8	3.4	31.84	12.56	4.08	0.18	NA	NA	2	58	72	80.2	108.1
R3	B3	Kolda	M07-06-F-A01	23.5	13.4	3.8	26.42	12.14	5.55	0.225	7.148	4.368	2	56	72	79.4	98.46
R1	B5	Sinthiou2	M07-06-F-A01	22.12	15.4	4.6	21.62	12.52	8.18	0.26	4.7	3.32	3	57	73	24.2	129.6
R2	B2	Sinthiou2	M07-06-F-A01	22.38	14.4	4.2	24.8	11.5	8	0.28	5.16	3.78	3.8	58	73	31.8	116
R3	B3	Sinthiou2	M07-06-F-A01	32.68	14.8	3.6	24.84	13.92	6.36	0.14	8.72	6.46	3.4	57	73	34.6	129
R1	B6	Kolda	M07-07-F-A01	21.66	13	3.8	31.58	12.12	5.3	0.28	6.712	4.154	2	56	68	61.8	109.8
R2	B1	Kolda	M07-07-F-A01	15.888	14.8	3.8	28.4	13	5.64	0.26	6.542	4.996	2	56	72	45.8	114.96
R3	B5	Kolda	M07-07-F-A01	29.08	9	3	28.9	12.68	4.45	0.225	7.92	4.16	2	56	70	166.6	85.4
R1	B6	Sinthiou2	M07-07-F-A01	18.26	14.4	4.8	25.5	13.32	8.1	0.22	5.334	3.88	3.6	54	70	19.2	129.2
R2	B1	Sinthiou2	M07-07-F-A01	12.08	16	4.2	26.4	13.2	6.2	0.2	2.92	2.44	3.6	55	69	18	113.2
R3	B5	Sinthiou2	M07-07-F-A01	11.52	16.2	4.2	22.2	11.06	5.96	0.18	2.34	1.76	3.4	54	69	22.8	125
R1	B2	Kolda	M07-09-F-A01	35.1667	13.6	5	30.48	12.58	8.24	0.28	10.6	7.1	2	54	68	40.2	127.54
R2	B1	Kolda	M07-09-F-A01	11.18	13.4	4.2	15.6	10.84	5.975	0.24	4.72	4.64	2	56	68	23.8	95.2
R3	B8	Kolda	M07-09-F-A01	14.22	10.4	3.4	28.18	12.52	4.02	0.14	5.66	3.88	2	56	68	28.4	93.42
R1	B2	Sinthiou2	M07-09-F-A01	17.42	15	3.6	25.9	12.08	5.52	0.14	4.38	3.1	3.2	56	70	18.4	108.6
R2	B1	Sinthiou2	M07-09-F-A01	5.14	13	4	28.36	10.72	5.66	0.16	1	0.825	3.2	56	70	9.4	104.8
R3	B8	Sinthiou2	M07-09-F-A01	6.24	15	4.6	28.92	12.26	8.36	0.28	1.66	1.44	3.2	55	70	13.2	112.4
R1	B1	Kolda	M08-02-F-A01	48.08	14	3.8	29.5	14.08	7.06	0.32	16.58	11.36	2	61	74	91.6	127.44
R2	B6	Kolda	M08-02-F-A01	9.902	10.8	3.4	35.16	13.72	6.26	0.32	4.29	3.242	2	58	72	33.6	99.14
R3	B4	Kolda	M08-02-F-A01	48.34	13	3.4	30.84	11.12	5.12	0.24	14.18	9.28	2	58	74	141.8	96.58
R1	B1	Sinthiou2	M08-02-F-A01	17.06	15	4	33	13.04	6.08	0.16	4.04	3.12	3	66	78	24	122.4
R2	B6	Sinthiou2	M08-02-F-A01	15.04	15.4	3.8	26.72	9.64	5.58	0.2	4.48	3.48	3.6	66	79	26	122.2
R3	B4	Sinthiou2	M08-02-F-A01	24.62	16.8	3.4	29.74	11.8	6.22	0.26	4.62	3.2	3.6	66	80	26.6	121.4
R1	B7	Kolda	M08-03-F-A01	26.24	9.2	3.2	36.12	12.86	5.08	0.18	5.9	3.1	2	62	80	148.4	91.08
R2	B6	Kolda	M08-03-F-A01	33.5	13.2	4.2	26.12	12.1	5.26	0.24	13.76	10.2	2	58	72	110.4	96.62
R3	B5	Kolda	M08-03-F-A01	21.74	12.4	3.6	28.8	11.54	5.02	0.2	4.7	3.18	2	56	68	123.4	105.5
R1	B7	Sinthiou2	M08-03-F-A01	22.3	17	4.8	24.56	10.4	4.28	0.22	4.54	3.7	3.4	58	72	50.2	128
R2	B6	Sinthiou2	M08-03-F-A01	22.1	17.6	3.8	23.8	11.94	6.4	0.24	2.8	2.02	3.6	59	71	33.6	126.2
R3	B5	Sinthiou2	M08-03-F-A01	31.24	17.8	4.4	21.64	11.18	4.66	0.16	3.67	2.86	3.4	58	72	61.2	113.2
R1	B8	Kolda	M08-05-F-A01	26.46	11.4	3.2	33.74	12.78	4.82	0.28	9.74	6.1	2	62	72	84.4	89.18
R2	B1	Kolda	M08-05-F-A01	44.72	14	3.4	34.08	12.22	5	0.29	10.34	5.02	2	60	81	210	112.1
R3	B2	Kolda	M08-05-F-A01	29.4	14.2	3.6	31.42	13.5	7.22	0.3	6.62	4.32	2	58	73	95.4	113.62
R1	B8	Sinthiou2	M08-05-F-A01	8.26	14.6	4	34.32	11.9	6.76	0.26	2	1.62	3.4	62	75	12.8	125.4
R2	B1	Sinthiou2	M08-05-F-A01	11.362	14.8	3.8	30.1	13.12	6.1	0.26	2.71	2.084	3.4	63	74	17	140
R3	B2	Sinthiou2	M08-05-F-A01	8.98	13.2	3.2	35.32	12.48	6.38	0.3	2.4	1.72	2.8	64	75	13.4	129.6

## Sheet: TableS8
Table S8. Loci associated with selective sweep regions.
chr	Gene	Blastp_anno
1A	De1Ag00880-RA	Homeobox protein ATH1
1B	De1Bg01683-RA	protein BONZAI 1
1B	De1Bg01796-RA	protein NEDD1
2B	De2Bg02360-RA	protein LONGIFOLIA 2 isoform X2
2B	De2Bg02671-RA	chromatin assembly factor 1 subunit FSM-like
3A	De3Ag01946-RA	transcription factor DIVARICATA
3A	De3Ag02452-RA	Receptor-like protein kinase ANXUR1
3A	De3Ag02576-RA	protein MAIN-LIKE 1-like
3B	De3Bg00776-RA	UBP12
3B	De3Bg01034-RA	receptor-like protein kinase ANXUR1
5B	De5Bg02194-RA	light-mediated development protein DET1 isoform X2
7A	De7Ag00288-RA	Transcription factor PCF1
7B	De7Bg01850-RA	protein FLOWERING LOCUS T
8A	De8Ag00784-RA	protein LAZY 1
8B	De8Bg00452-RA	3-ketoacyl-CoA synthase 20
9A	De9Ag02194-RA	LOB domain-containing protein 18
9B	De9Bg02323-RA	AHK2

## Sheet: TableS9
Table S9. Loci associated with genome wide association (GWAS) peaks
trait	SNP	Chromosome	Position	P.value	maf	nobs	FDR_Adjusted_P-values
PanicleYield	S5B_26033780	5B	26033780	4.58e-15	0.0810811	37	3.53e-10	De5Bg02464-RA	GIGANTEA
PanicleYield	S1B_28120690	1B	28120690	6.97e-11	0.405405	37	2.68e-06	De1Bg02301-RA	HY5
PanicleYield	S2B_609186	2B	609186	1.38e-10	0.459459	37	3.53e-06	De2Bg00036-RA	PRR37
PanicleYield	S6B_7598680	6B	7598680	5.82e-08	0.243243	37	0.00112044	De6Bg00864-RA	CURVATURE THYLAKOID 1A, chloroplastic
TillerNumber	S3B_20829271	3B	20829271	2.49e-12	0.486486	37	1.92e-07	De3Bg01353-RA	BBX30
PlantHeaight	S5B_15938424	5B	15938424	8.52e-22	0.337838	37	6.56e-17	De5Bg01812-RA	PARTING DANCERS isoform X1
PlantHeaight	S9B_34480479	9B	34480479	3.82e-20	0.459459	37	1.47e-15	De9Bg02823-RA	GRAVITROPIC IN THE LIGHT 1
PlantHeaight	S4B_3834503	4B	3834503	1.81e-14	0.337838	37	4.64e-10	De4Bg00454-RA	cryptochrome DASH, chloroplastic/mitochondrial
PlantHeaight	S2B_12293269	2B	12293269	1.61e-13	0.486486	37	3.1e-09	De2Bg01469-RA	FLOWERING LOCUS T-like isoform X3
PlantHeaight	S1B_15642642	1B	15642642	4.58e-11	0.324324	37	7.05e-07	De1Bg01683-RA	BONZAI 1
PlantHeaight	S5A_25640451	5A	25640451	3.2e-08	0.5	37	0.000410523	De5Ag01892-RA	hypothetical protein C2845_PM08G29470

## Sheet: TableS10
Table S10. The result oif RHT1 disruptions in crops.
Crop	Ortholog	Function	Impact	Reference
Wheat	RHT1	DELLA protein	Semi-dwarf trait, improved lodging resistance and yield	Wilhelm, E. P., et al. (2013). https://doi.org/10.1007/s00122-013-2055-3
Rice	SD1	GA 20-oxidase enzyme	Semi-dwarf trait, improved yield	Sasaki, A., et al. (2002). https://doi.org/10.1038/416701a
Barley	SLN1	DELLA protein	Reduced height, improved lodging resistance	Chandler, P. M., et al. (2002). https://doi.org/10.1046/j.0960-7412.2001.01235.x
Maize	D8 and D9	DELLA proteins	Dwarfing, improved standability	Winkler, R. G., & Helentjaris, T. (1995). https://doi.org/10.1105/tpc.7.8.1307
Sorghum	Dw3	Auxin transport regulator	Reduced height, improved stability	Multani, D. S., et al. (2003). https://doi.org/10.1126/science.1086072
Arabidopsis	GAI and RGA	DELLA proteins	Growth suppression, GA signaling regulation	Peng, J., et al. (1997). https://doi.org/10.1038/22307
Rapeseed	BnRGA	DELLA protein	Height control, yield improvement	Muangprom, A., et al. (2005). https://doi.org/10.1016/j.plantsci.2005.05.010
Tomato	PROCERA (PRO)	DELLA protein	Semi-dwarf trait, altered gibberellin responses	Bassel, G. W., et al. (2008). https://doi.org/10.1111/j.1365-313X.2007.03349.x
Pea	LA (Lentus)	DELLA protein	Stem elongation regulation, altered gibberellin sensitivity	Weston, D. E., et al. (2008). https://doi.org/10.1104/pp.108.118505
